# Supplementary material for: Two Polymorphisms in the Fractalkine Receptor CX3CR1 Gene Influence the Development of Atherosclerosis: A Meta-Analysis
Source: Hindawi journal article supplement (doi:10.1155/2014/913678), 2014-01-01

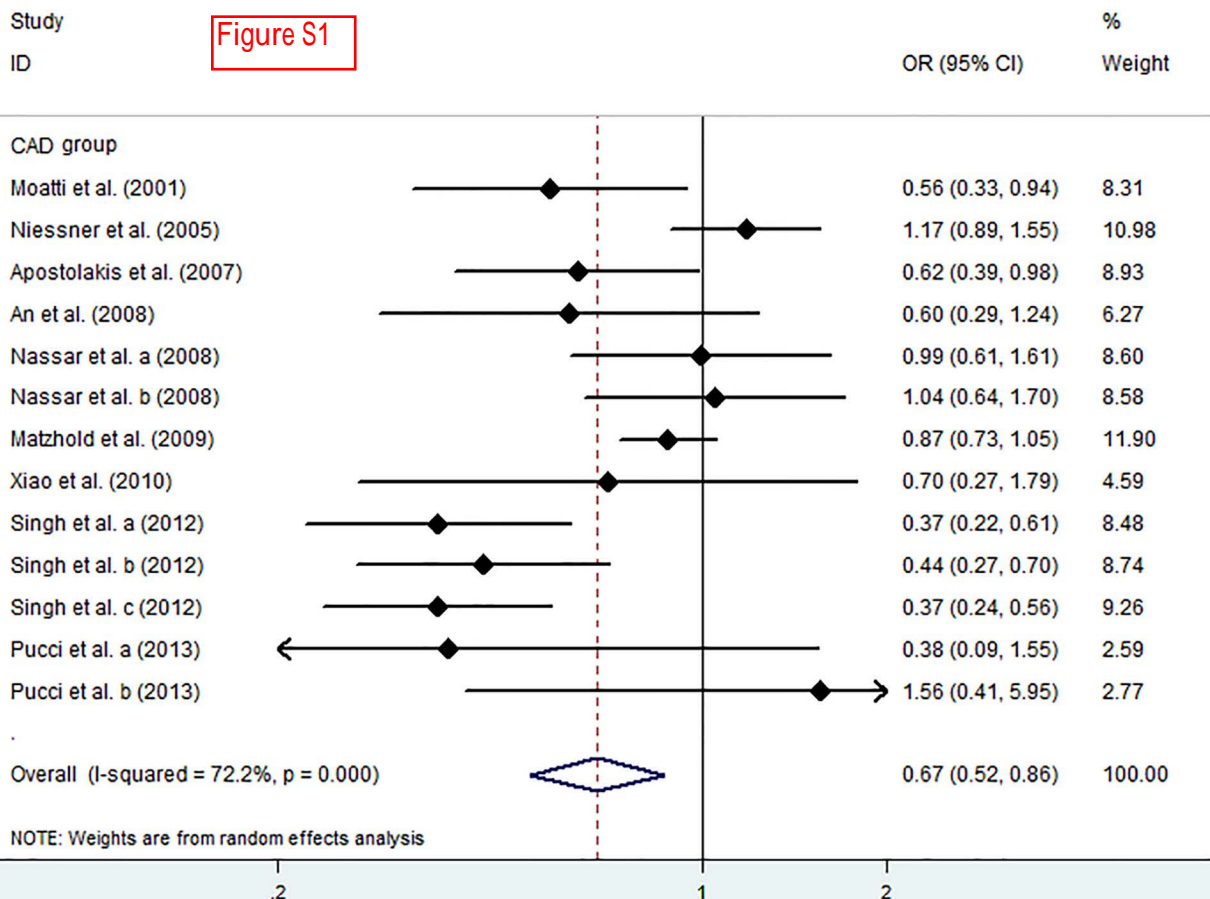

Study

Figure S2

%

ID

OR (95% CI)

Weight

ICVD group

Lavergne et al. (2005)

2.83 (1.23, 6.47)

46.01

Peng et al. (2008)

5.18 (0.25, 108.88)

3.41

Zhang et al. (2010)

1.45 (0.13, 16.29)

5.40

Shi et al. (2012)

3.00 (1.26, 7.16)

41.79

Wu et al. (2012)

3.52 (0.17, 74.23)

3.40

Subtotal (I-squared = 0.0%, p = 0.975)

2.88 (1.64, 5.04)

100.00

Overall (I-squared = 0.0%, p = 0.975)

2.88 (1.64, 5.04)

100.00

NOTE: Weights are from random effects analysis

.1

1

109

Figure S3

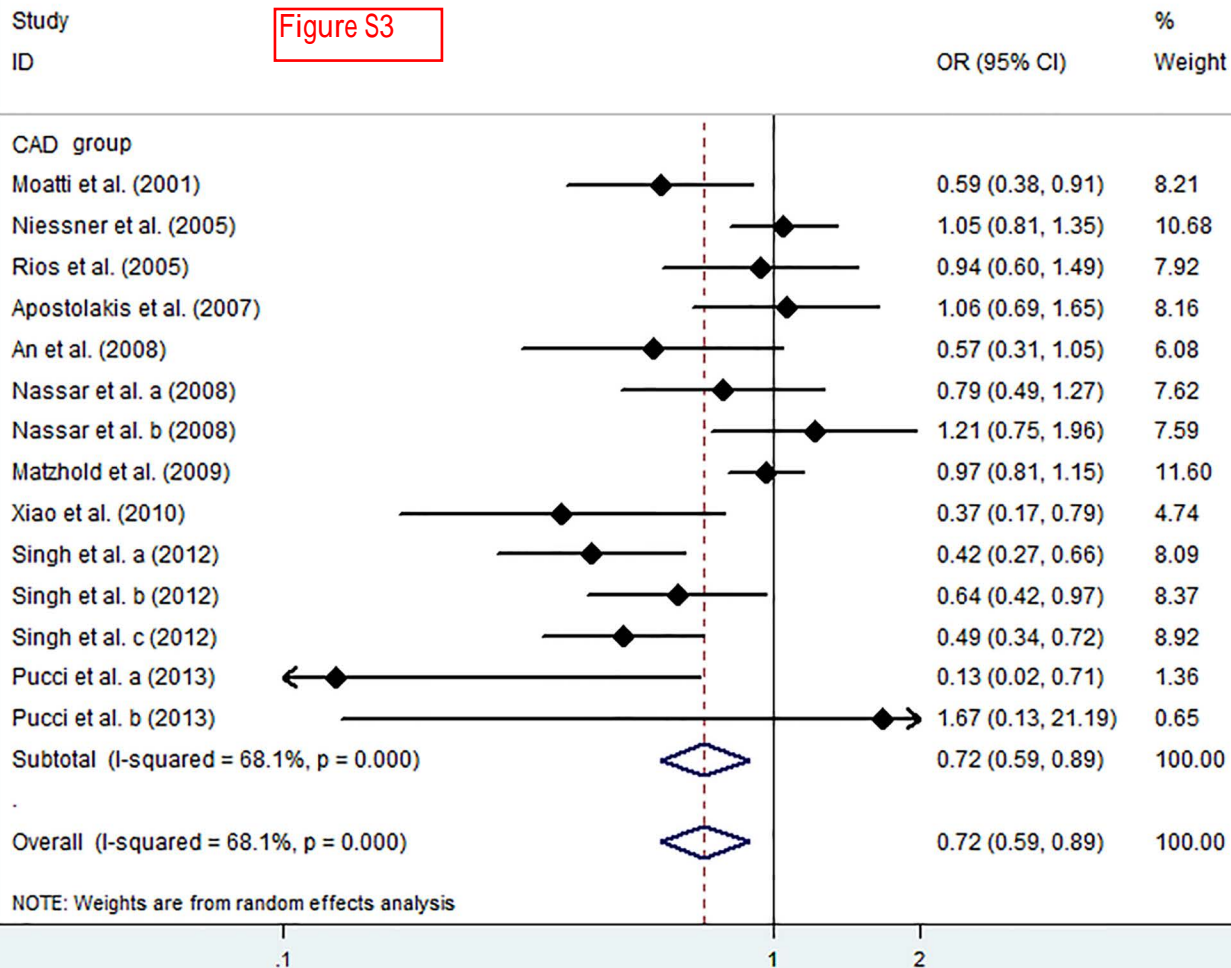

Supplement: f1 [file 913678.f1.zip]
