# Supplementary material for: Two Polymorphisms in the Fractalkine Receptor CX3CR1 Gene Influence the Development of Atherosclerosis: A Meta-Analysis
Source: Dis Markers. 2014 Aug 26;2014:913678. doi: 10.1155/2014/913678 (PMC4158466; doi:10.1155/2014/913678)
Supplement: Supplementary file 1 — Checklist S1: The PRISMA 2009 checklist. Figure S1: Forest plot for CX3CR1 T280M polymorphism and AS risk in CAD group (TM versus TT). Figure S2: Forest plot for CX3CR1 T280M polymorphism and AS risk in ICVD group (MM versus TT). Figure S3: Forest plot for CX3CR1 V249I polymorphism and AS risk in CAD group (VI versus VV). Table S1: GRADE profile evidence of the included studies. Table S2: Genotype distribution in cases and controls. Table S3: Heterogeneity test of CX3CR1 T280M and V249I polymorphisms and risk of AS in each subgroup. [file 913678.f1.zip]

Archive with 2 entries (2 files):
- 913678.f1/Figures-Supplementary Material.pdf
- 913678.f1/Supplementary Material.pdf
